# Supplementary material
Source: Elsevier journal article supplement (http://raiithold.iith.ac.in/1273/1/mmc1.pdf)
Supplement: mmc1 [file mmc1.pdf]

# Mineralization of Endosulfan from Water by Nonthermal Plasma: A Green Approach for Treatment of Pesticide Contaminated Water

P. Manoj Kumar Reddy, Shaik Mahammadunnisa and Ch. Subrahmanyam\*

Energy and Environmental research laboratory, Department of Chemistry,  
Indian Institute of Technology (IIT)-Hyderabad, 502205, Andhra Pradesh, India.

## Supporting Information

### 1. Characterization of the ceria catalyst

#### 1.1. Nitrogen adsorption-desorption isotherm

The N<sub>2</sub> adsorption – desorption isotherms shown in Fig. S1. The BET surface area of the ceria was deduced from adsorption – desorption isotherms it is around 89 m<sup>2</sup>/g and pore size 19.2 Å and pore volume 0.073 cc/g.

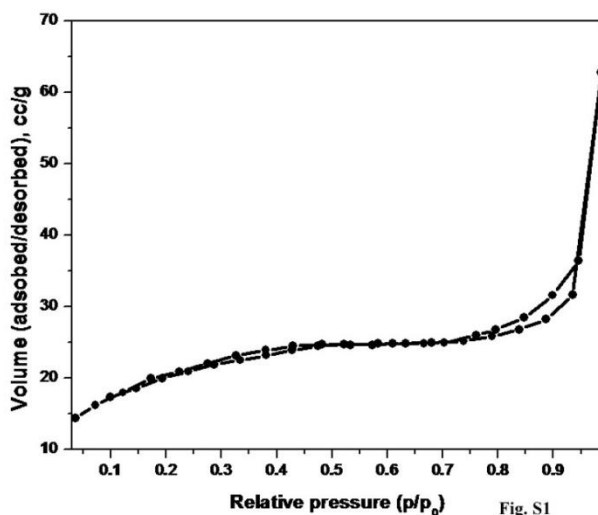

Fig.S1: Nitrogen adsorption and desorption isotherm of powder CeO<sub>2</sub> prepared by combustion synthesis.

#### 1.2. X-ray diffraction

The formation of ceria fluorite structure was confirmed by XRD pattern as shown in Fig. S2 (JCPDF#810792). The crystal size calculated from the Debye-Scherrer method and it was found that the size of the synthesized CeO<sub>2</sub> is around 15 nm.

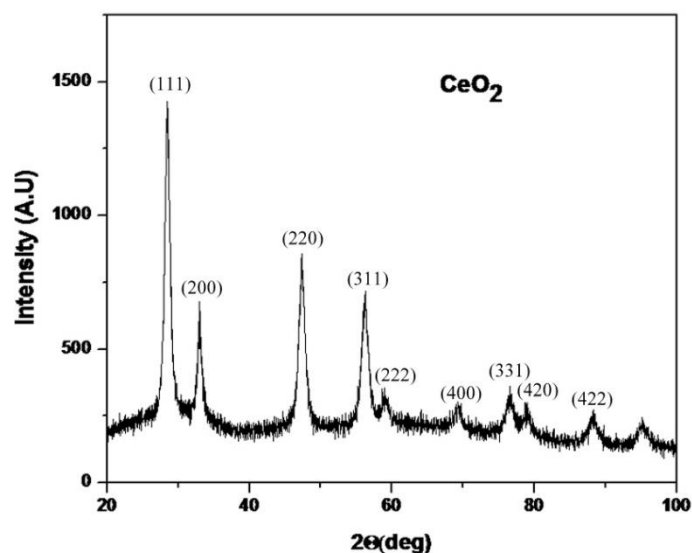

Fig. S2: XRD diffraction patterns of the CeO<sub>2</sub> catalysts

### 1.3. Raman spectroscopy

Raman spectroscopy is one of the powerful tools for characterization of ceria. The strong peak at 464 cm<sup>-1</sup> was assigned to F2g Raman active interior phonon mode of CeO<sub>2</sub> fluorite structure, whereas, the second peak around 600 cm<sup>-1</sup> was due to the presence defect induced oxygen vacancies (D-band) on the surface. The presence of Ce<sup>+3</sup>/Ce<sup>+4</sup> (oxygen vacancies) is believed to be the cause of the high reactivity of CeO<sub>2</sub> for ozone decomposition catalyst.

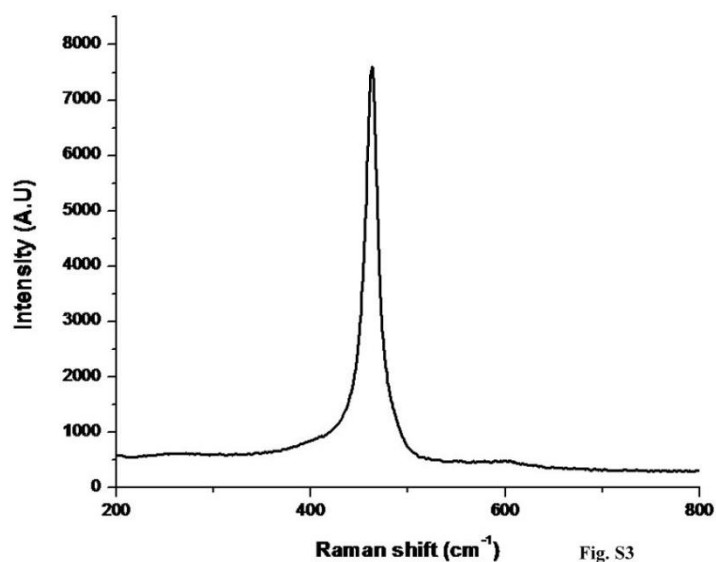

Fig. S3: Raman of the CeO<sub>2</sub> catalysts
